# Supplementary material for: Neutrophil-Mediated Endogenous Analgesia Contributes to Sex Differences in Oral Cancer Pain
Source: PubMed Central journal article supplement (PMC6204375; doi:10.3389/fnint.2018.00052), 2018-10-22
Supplement: Image_1.pdf [file Image_1.pdf]

### ORAL PAIN QUESTIONNAIRE

**Mark on the line after each question the level of pain you have experienced during the past week:**

1. When you *are not* talking, eating or drinking how **intense** (severe, strong) is the pain in your mouth?

|         |                                                                                                                                    |                                                  |  |
|---------|------------------------------------------------------------------------------------------------------------------------------------|--------------------------------------------------|--|
| No pain | <div style="position: absolute; left: -10px; top: -5px;"> </div> <div style="position: absolute; right: -10px; top: -5px;"> </div> | The most intense<br>pain sensation<br>imaginable |  |
|---------|------------------------------------------------------------------------------------------------------------------------------------|--------------------------------------------------|--|

2. When you *are* talking, eating or drinking how **intense** (severe, strong) is the pain in your mouth?

|         |                                                                                                                                    |                                                  |  |
|---------|------------------------------------------------------------------------------------------------------------------------------------|--------------------------------------------------|--|
| No pain | <div style="position: absolute; left: -10px; top: -5px;"> </div> <div style="position: absolute; right: -10px; top: -5px;"> </div> | The most intense<br>pain sensation<br>imaginable |  |
|---------|------------------------------------------------------------------------------------------------------------------------------------|--------------------------------------------------|--|

3. When you *are not* talking, eating or drinking how **sharp** (like a knife) is the pain in your mouth?

|         |                                                                                                                                    |                                                |  |
|---------|------------------------------------------------------------------------------------------------------------------------------------|------------------------------------------------|--|
| No pain | <div style="position: absolute; left: -10px; top: -5px;"> </div> <div style="position: absolute; right: -10px; top: -5px;"> </div> | The most sharp<br>pain sensation<br>imaginable |  |
|---------|------------------------------------------------------------------------------------------------------------------------------------|------------------------------------------------|--|

4. When you *are* talking, eating or drinking how **sharp** (like a knife) is the pain in your mouth?

|         |                                                                                                                                    |                                                |  |
|---------|------------------------------------------------------------------------------------------------------------------------------------|------------------------------------------------|--|
| No pain | <div style="position: absolute; left: -10px; top: -5px;"> </div> <div style="position: absolute; right: -10px; top: -5px;"> </div> | The most sharp<br>pain sensation<br>imaginable |  |
|---------|------------------------------------------------------------------------------------------------------------------------------------|------------------------------------------------|--|

5. When you *are not* talking, eating or drinking how **aching** (like a throbbing muscle ache or toothache) is the pain in your mouth?

|         |                                                                                                                                    |                                                 |  |
|---------|------------------------------------------------------------------------------------------------------------------------------------|-------------------------------------------------|--|
| No pain | <div style="position: absolute; left: -10px; top: -5px;"> </div> <div style="position: absolute; right: -10px; top: -5px;"> </div> | The most aching<br>pain sensation<br>imaginable |  |
|---------|------------------------------------------------------------------------------------------------------------------------------------|-------------------------------------------------|--|

6. When you *are* talking, eating or drinking how **aching** (like a throbbing muscle ache or toothache) is the pain in your mouth?

|         |                                                                                                                                    |                                                 |  |
|---------|------------------------------------------------------------------------------------------------------------------------------------|-------------------------------------------------|--|
| No pain | <div style="position: absolute; left: -10px; top: -5px;"> </div> <div style="position: absolute; right: -10px; top: -5px;"> </div> | The most aching<br>pain sensation<br>imaginable |  |
|---------|------------------------------------------------------------------------------------------------------------------------------------|-------------------------------------------------|--|

7. How **sensitive** (like sunburned or raw skin) is the area in your mouth to touch by your teeth, food or fluids?

|                |                                                                                                                                    |                                                    |  |
|----------------|------------------------------------------------------------------------------------------------------------------------------------|----------------------------------------------------|--|
| No sensitivity | <div style="position: absolute; left: -10px; top: -5px;"> </div> <div style="position: absolute; right: -10px; top: -5px;"> </div> | The most sensitive<br>pain sensation<br>imaginable |  |
|----------------|------------------------------------------------------------------------------------------------------------------------------------|----------------------------------------------------|--|

8. How significantly does the pain in your mouth restrict your talking, eating or drinking?

|                |                                                                                                                                    |                                              |  |
|----------------|------------------------------------------------------------------------------------------------------------------------------------|----------------------------------------------|--|
| No restriction | <div style="position: absolute; left: -10px; top: -5px;"> </div> <div style="position: absolute; right: -10px; top: -5px;"> </div> | The most severe<br>restriction<br>imaginable |  |
|----------------|------------------------------------------------------------------------------------------------------------------------------------|----------------------------------------------|--|

Coordinator's Signature: \_\_\_\_\_

Date: \_\_\_\_\_  
mm/dd/yyyy
